# Supplementary material for: FUT2–ABO epistasis increases the risk of early childhood asthma and Streptococcus pneumoniae respiratory illnesses
Source: PubMed Central journal article supplement (PMC7744576; doi:10.1038/s41467-020-19814-6), 2020-12-16
Supplement: 41467_2020_19814_MOESM4_ESM.pdf [file 41467_2020_19814_MOESM4_ESM.pdf]

## **Description of Additional Supplementary Files**

Supplementary Data 1

All genome-wide significant SNPs from the discovery GWAS meta-analysis.

Supplementary Data 2

Severity stratification based on the number of hospitalizations for COPSACsevere and iPSYCH.

Supplementary Data 3

*FUT2* and *ABO* main and stratified effects for each severity stratum in COPSACsevere
